# Supplementary material
Source: publisher figshare collection journal article supplement (https://tandf.figshare.com/ndownloader/files/23235203)
Supplement: Supplementary file 1 [file 23235203]

**Supplemental online material**

**
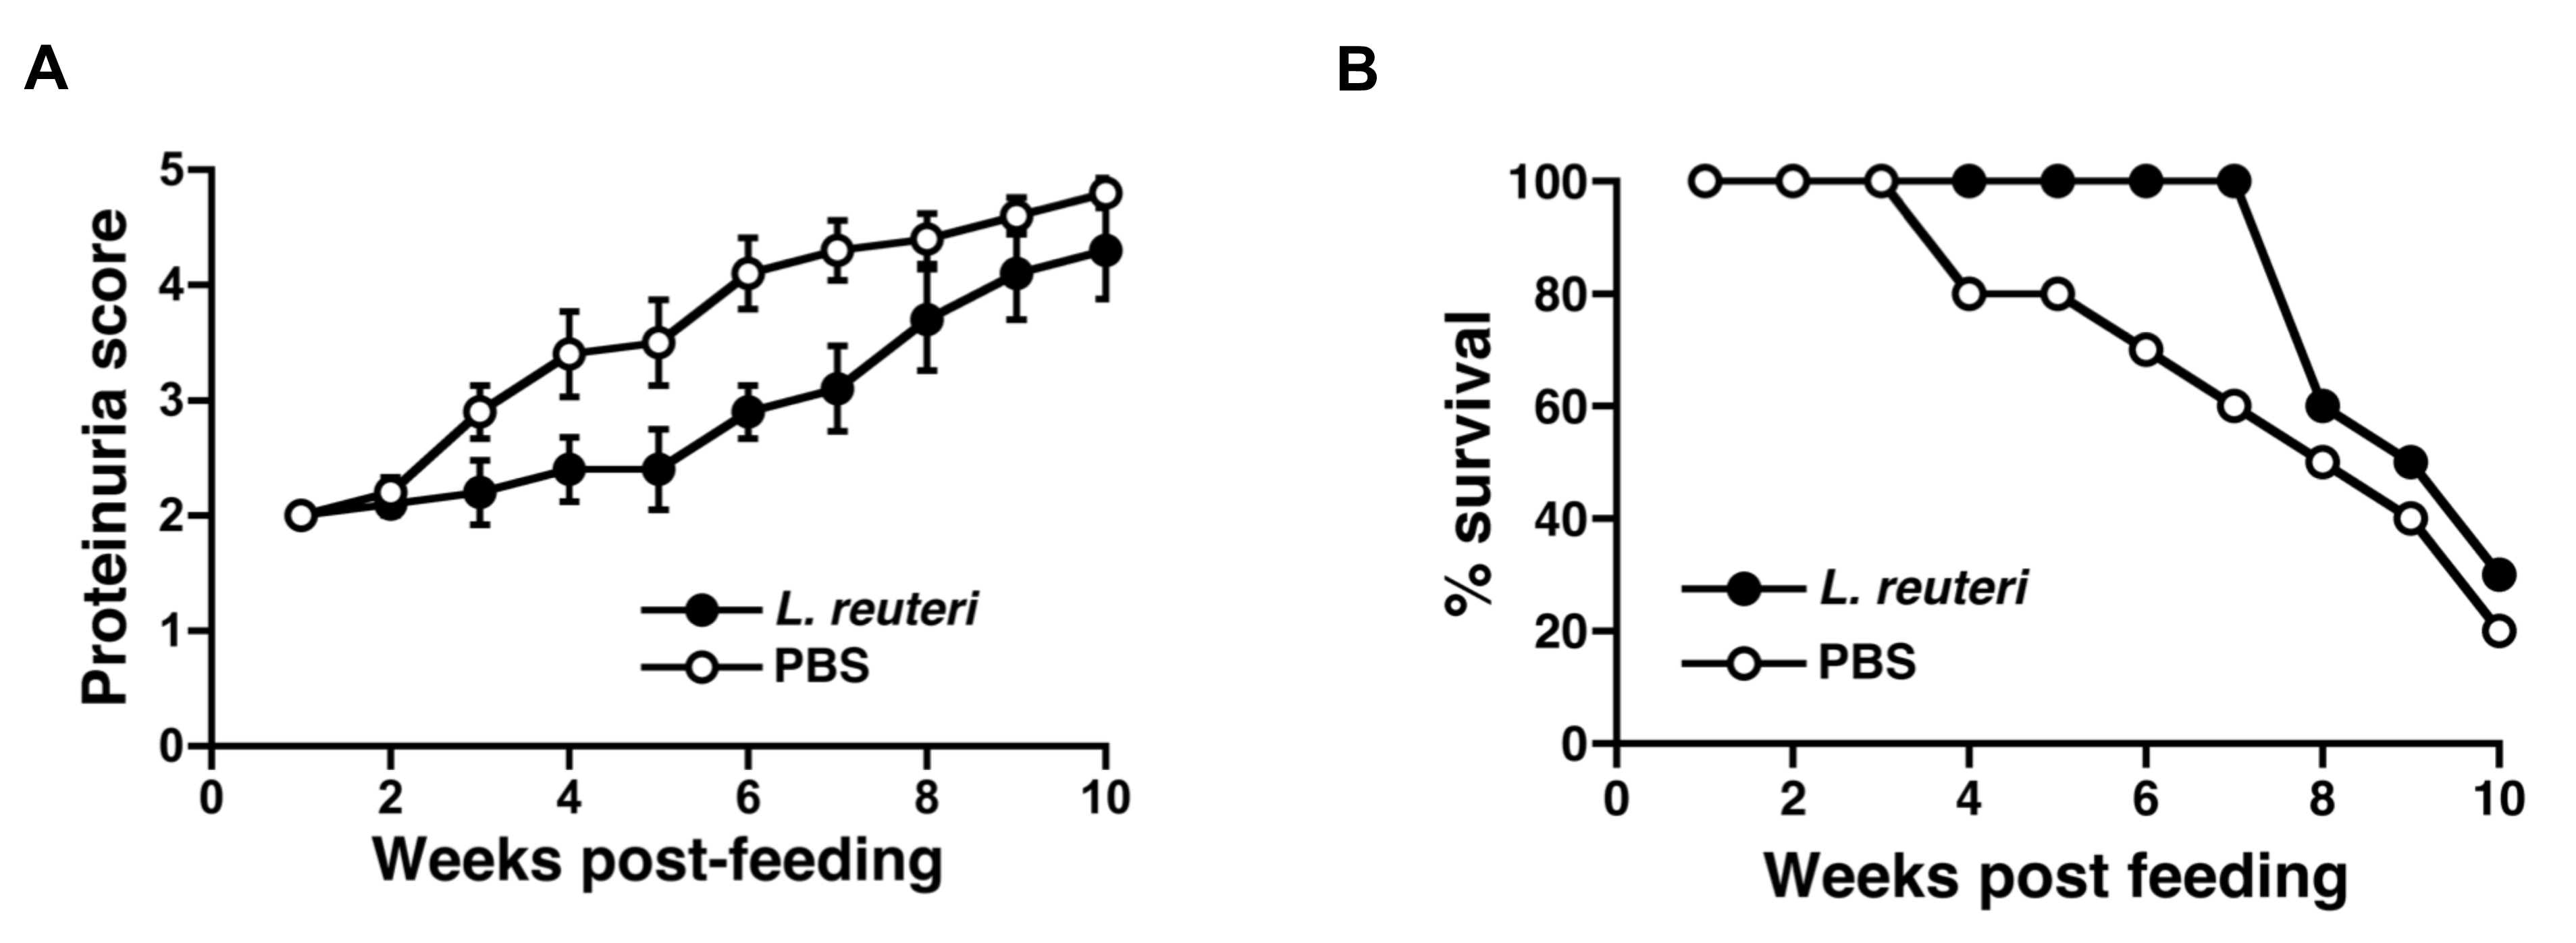
**

**Figure S1. Lupus progression in BWF1 mice fed *L. reuteri* after disease establishment.**

BWF1 mice with early stage of disease (100 mg/dl) were fed either PBS or rodent *L. reuteri* (109 CFU/ml) by gavage twice a week (n=10 mice). Urine was collected weekly and tested for the presence of protein, and proteinuria score (A) and percent survival (B) are shown.
